# Supplementary material for: Combination of Epicatechin 3‐Gallate fromEuphorbia hirtaand Cefepime Promotes Potential Synergistic Eradication Action against Resistant Clinical Isolate ofPseudomonas aeruginosa
Source: Hindawi journal article supplement (doi:10.1155/2018/5713703), 2018-01-01
Supplement: f1 [file 5713703.f1.pdf]

|          | <b>1</b> | <b>2</b>              | <b>3</b>            | <b>4</b>            | <b>5</b>            | <b>6</b>            | <b>7</b>             | <b>8</b>             |
|----------|----------|-----------------------|---------------------|---------------------|---------------------|---------------------|----------------------|----------------------|
| <b>A</b> | Cef 32   | E 0.5<br>+<br>Cef 32  | E 1<br>+<br>Cef 32  | E 2<br>+<br>Cef 32  | E 4<br>+<br>Cef 32  | E 8<br>+<br>Cef 32  | E 16<br>+<br>Cef 32  | E 32<br>+<br>Cef 32  |
| <b>B</b> | Cef 16   | E 0.5<br>+<br>Cef 16  | E 1<br>+<br>Cef 16  | E 2<br>+<br>Cef 16  | E 4<br>+<br>Cef 16  | E 8<br>+<br>Cef 16  | E 16<br>+<br>Cef 16  | E 32<br>+<br>Cef 16  |
| <b>C</b> | Cef 8    | E 0.5<br>+<br>Cef 8   | E 1<br>+<br>Cef 8   | E 2<br>+<br>Cef 8   | E 4<br>+<br>Cef 8   | E 8<br>+<br>Cef 8   | E 16<br>+<br>Cef 8   | E 32<br>+<br>Cef 8   |
| <b>D</b> | Cef 4    | E 0.5<br>+<br>Cef 4   | E 1<br>+<br>Cef 4   | E 2<br>+<br>Cef 4   | E 4<br>+<br>Cef 4   | E 8<br>+<br>Cef 4   | E 16<br>+<br>Cef 4   | E 32<br>+<br>Cef 4   |
| <b>E</b> | Cef 2    | E 0.5<br>+<br>Cef 2   | E 1<br>+<br>Cef 2   | E 2<br>+<br>Cef 2   | E 4<br>+<br>Cef 2   | E 8<br>+<br>Cef 2   | E 16<br>+<br>Cef 2   | E 32<br>+<br>Cef 2   |
| <b>F</b> | Cef 1    | E 0.5<br>+<br>Cef 1   | E 1<br>+<br>Cef 1   | E 2<br>+<br>Cef 1   | E 4<br>+<br>Cef 1   | E 8<br>+<br>Cef 1   | E 16<br>+<br>Cef 1   | E 32<br>+<br>Cef 1   |
| <b>G</b> | Cef 0.5  | E 0.5<br>+<br>Cef 0.5 | E 1<br>+<br>Cef 0.5 | E 2<br>+<br>Cef 0.5 | E 4<br>+<br>Cef 0.5 | E 8<br>+<br>Cef 0.5 | E 16<br>+<br>Cef 0.5 | E 32<br>+<br>Cef 0.5 |
| <b>H</b> | 0        | E 0.5                 | E 1                 | E 2                 | E 4                 | E 8                 | E 16                 | E 32                 |

**Figure S1:** Broth microdilution checkerboard plate containing respective combination of concentrations ( $\mu\text{g/mL}$ ) of epicatechin 3-gallate and cefepime. E; epicatechin 3-gallate and Cef; cefepime. The final concentration of epicatechin 3-gallate and cefepime were 0.5, 1, 2, 4, 8, 16 and 32  $\mu\text{g/mL}$  respectively.
